# Supplementary material
Source: PubMed Central journal article supplement (PMC3042434)
Supplement: 110085_1.pdf [file 110085_1.pdf]

| <b>Appendix 1 (as supplied by authors): Partnerships between health organizations and the food industry</b> |                                                                |                                                                                                                                                                  |                                                                                                                                                                                                                                                                                                             |                                                                                                                                                                             |
|-------------------------------------------------------------------------------------------------------------|----------------------------------------------------------------|------------------------------------------------------------------------------------------------------------------------------------------------------------------|-------------------------------------------------------------------------------------------------------------------------------------------------------------------------------------------------------------------------------------------------------------------------------------------------------------|-----------------------------------------------------------------------------------------------------------------------------------------------------------------------------|
| American Academy of Family Physicians                                                                       | Coca Cola                                                      | \$600,000 grant and development of educational material for AAFP's patient resource webpage familydoctor.org                                                     | <a href="http://www.aafp.org/online/en/home/publications/news/news-now/inside-aafp/20091006cons-alli-coke.html">http://www.aafp.org/online/en/home/publications/news/news-now/inside-aafp/20091006cons-alli-coke.html</a>                                                                                   |                                                                                                                                                                             |
| American Diabetes Association                                                                               | Cadbury-Schweppes                                              | 2005-2008 National and local support of ADA Weight Loss Matters & America's Walk for Diabetes                                                                    | <a href="http://collaboration.cadbury.com/SiteCollectionDocuments/Responding%20to%20Consumer%20Health%20Concerns%20-%20Consumer%20Health%20Programs.pdf">http://collaboration.cadbury.com/SiteCollectionDocuments/Responding%20to%20Consumer%20Health%20Concerns%20-%20Consumer%20Health%20Programs.pdf</a> |                                                                                                                                                                             |
| American Dietetic Association                                                                               | Hershey's                                                      | Funded visits with RDs & establishment of partnership website                                                                                                    | <a href="http://www.eatright.org/Media/content.aspx?id=6442452998">http://www.eatright.org/Media/content.aspx?id=6442452998</a>                                                                                                                                                                             |                                                                                                                                                                             |
| Boys and Girls Clubs of America                                                                             | Yum! Brands                                                    | Sponsorship, food provision, scholarships, co-branded fundraising involving sale of Taco Bell food                                                               | <a href="http://www.tacobellgraduation.com/Press_Room_2009_Fundraiser.html">http://www.tacobellgraduation.com/Press_Room_2009_Fundraiser.html</a>                                                                                                                                                           |                                                                                                                                                                             |
| British Nutrition Foundation                                                                                | Cadbury-Schweppes                                              | Sustaining member, positions on scientific committee, BNF council and board of trustees                                                                          | <a href="http://www.nutrition.org.uk/search/cadbury?ordering=&amp;searchphrase=all">http://www.nutrition.org.uk/search/cadbury?ordering=&amp;searchphrase=all</a>                                                                                                                                           |                                                                                                                                                                             |
| Canadian Association for Health, Physical Education, Recreation and Dance                                   | PepsiCo                                                        | Presenting sponsor of Balance First™ - an initiative aimed to teach children to "Balance" calories in vs. calories out                                           | <a href="http://www.fcpmc.com/issues/hal/initiatives.html">http://www.fcpmc.com/issues/hal/initiatives.html</a>                                                                                                                                                                                             |                                                                                                                                                                             |
| Juvenile Diabetes Research Foundation                                                                       | Boston Pizza                                                   | Sponsorship and co-branded fundraising involving sale of Boston Pizza food.                                                                                      | <a href="http://www.bostonpizza.com/en/about/pressreleases/2010/10-02-11/boston_pizza_foundation_breaks_through_10_million_fundraising_mark.aspx">http://www.bostonpizza.com/en/about/pressreleases/2010/10-02-11/boston_pizza_foundation_breaks_through_10_million_fundraising_mark.aspx</a>               |                                                                                                                                                                             |
| National Health Services UK                                                                                 | Kellogg's, Mars Inc., McCains, PepsiCo, Nestle, Tesco, Unilver | Funding and direction for UK government's anti-obesity campaign Change4Life in return for a promise of a "non-regulatory" approach in regard to food and obesity | <a href="http://www.guardian.co.uk/society/2010/jul/07/no-anti-junk-food-laws">http://www.guardian.co.uk/society/2010/jul/07/no-anti-junk-food-laws</a>                                                                                                                                                     |                                                                                                                                                                             |
| Oxford Health Alliance                                                                                      | PepsiCo                                                        | Development of Community Interventions for Health program                                                                                                        | <a href="http://www.pepsico.com/Purpose/Human-Sustainability/Partnerships-and-Community.html">http://www.pepsico.com/Purpose/Human-Sustainability/Partnerships-and-Community.html</a>                                                                                                                       | <a href="http://www.nhs.uk/Change4Life/Pages/national-partners.aspx">http://www.nhs.uk/Change4Life/Pages/national-partners.aspx</a>                                         |
| ParticipACTION                                                                                              | Coca Cola                                                      | Cobranded events, webpages and press releases via both ParticipACTION and SOGO Active                                                                            | <a href="http://www.participaction.com/en-us/PartnersAndSponsors/SpecialThanks.aspx">http://www.participaction.com/en-us/PartnersAndSponsors/SpecialThanks.aspx</a>                                                                                                                                         |                                                                                                                                                                             |
| Save the Children                                                                                           | PepsiCo                                                        | \$5 million sponsorship                                                                                                                                          | <a href="http://www.pepsico.com/Purpose/Human-Sustainability/Partnerships-and-Community.html">http://www.pepsico.com/Purpose/Human-Sustainability/Partnerships-and-Community.html</a>                                                                                                                       |                                                                                                                                                                             |
| Susan G. Komen for the Cure                                                                                 | Yum! Brands                                                    | KFC cobranded charitable campaign involving sales of fried chicken                                                                                               | <a href="http://www5.komen.org/KomenNewsArticle.aspx?id=6442452002">http://www5.komen.org/KomenNewsArticle.aspx?id=6442452002</a>                                                                                                                                                                           |                                                                                                                                                                             |
| The Heart and Stroke Foundation of Canada                                                                   | Boston Pizza                                                   | Sponsorship, co-branded fundraising involving sale of pizzas and provision of Boston Pizza coupons to school children                                            | <a href="http://www.bostonpizza.com/en/about/pressreleases/2010/10-02-09/boston_pizza%E2%80%99s_got_love_in_t">http://www.bostonpizza.com/en/about/pressreleases/2010/10-02-09/boston_pizza%E2%80%99s_got_love_in_t</a>                                                                                     | <a href="http://www.weightymatters.ca/2010/09/heart-and-stroke-still-marketing-for.html">http://www.weightymatters.ca/2010/09/heart-and-stroke-still-marketing-for.html</a> |

|                                    |                   |                                                                                  |                                                                                                           |  |
|------------------------------------|-------------------|----------------------------------------------------------------------------------|-----------------------------------------------------------------------------------------------------------|--|
|                                    |                   | involved in HSF fundraising.                                                     | he_oven.aspx                                                                                              |  |
| UNICEF                             | Cadbury-Schweppes | Cadbury co-branded fundraising campaign involving sale of Cadbury chocolate bars | DOI 10.1016/S0140-6736(10)61964-2                                                                         |  |
| Yale University School of Medicine | PepsiCo           | Establishment of MD/PhD Fellowship & Research Facility                           | <a href="http://opa.yale.edu/news/article.aspx?id=7152">http://opa.yale.edu/news/article.aspx?id=7152</a> |  |
